# Supplementary material for: Horizontal Alveolar Ridge Augmentation with Allogeneic Bone Block Graft Compared with Autogenous Bone Block Graft: a Systematic Review
Source: PubMed Central journal article supplement — J Oral Maxillofac Res. 2020 Mar 31;11(1):e1. doi: 10.5037/jomr.2020.11101 (PMC7191383; doi:10.5037/jomr.2020.11101), 2020-03-31
Supplement: jomr-11-e1-a001.pdf [file jomr-11-e1-a001.pdf]

**Appendix 1.** Search history. Comparison of allogeneic bone block graft with autogenous bone block graft for horizontal ridge augmentation in implant reconstruction: a systematic review

| Database                                    | Interface  | Result     | Date       |
|---------------------------------------------|------------|------------|------------|
| PubMed                                      | PubMed.gov | 117        | 13.03.2019 |
| Embase                                      | Embase.com | 54         | 13.03.2019 |
| Cochrane Library                            | Wiley      | 72         | 13.03.2019 |
| <b>All</b>                                  |            | <b>243</b> |            |
| <b>After duplicate-removal with Endnote</b> |            | <b>152</b> |            |

**Appendix 2.** PubMed search until the 13<sup>th</sup> of March, 2019

| Search | Query                                                                                                                                                                                                                                                                                                                                                                                                                                                                                                                                                                                                                                                                                                                                                                                                                                                                                                                                                                                                                                                                                                                                                                                                                                                                                                                                                                                                              | Items found |
|--------|--------------------------------------------------------------------------------------------------------------------------------------------------------------------------------------------------------------------------------------------------------------------------------------------------------------------------------------------------------------------------------------------------------------------------------------------------------------------------------------------------------------------------------------------------------------------------------------------------------------------------------------------------------------------------------------------------------------------------------------------------------------------------------------------------------------------------------------------------------------------------------------------------------------------------------------------------------------------------------------------------------------------------------------------------------------------------------------------------------------------------------------------------------------------------------------------------------------------------------------------------------------------------------------------------------------------------------------------------------------------------------------------------------------------|-------------|
| #42    | Search ((((((“Alveolar Ridge Augmentation”[Mesh]) OR ((alveolar ridge augment*[Text Word]) OR alveolar augment*[Text Word])) OR ((lateral ridge augment*[Text Word]) OR horizontal ridge augment*[Text Word]))) AND ((((((“Allografts”[Mesh]) OR allograft*[Text Word]) OR ((allogeneic*[Text Word]) OR allogenic*[Text Word])) OR “Cryopreservation”[Mesh]) OR fresh-frozen*[Text Word]) OR “Freeze Drying”[Mesh]) OR ((freeze dry*[Text Word]) OR freeze drier*[Text Word]))) AND ((((((“Randomized Controlled Trial” [Publication Type]) OR “Controlled Clinical Trial” [Publication Type]) OR “Randomized Controlled Trials as Topic”[Mesh]) OR “Controlled Clinical Trials as Topic”[Mesh]) OR “Retrospective Studies”[Mesh]) OR “Prospective Studies”[Mesh]) OR ((((((“Controlled Clinical Trial”[Publication Type]) OR “Controlled Clinical Trials as Topic”[Mesh])) OR ((random*[Text Word] OR controlled[Text Word] OR crossover[Text Word] OR cross-over[Text Word] OR blind*[Text Word] OR mask*[Text Word])) AND (trial[Text Word] OR trials[Text Word] OR study[Text Word] OR studies[Text Word] OR analys*[Text Word] OR analyz*[Text Word] OR rct[Text Word] OR rcts[Text Word] OR rct[Text Word] OR ((singl*[Text Word] OR doubl*[Text Word] OR tripl*[Text Word] OR mask*[Text Word])) AND (blind[Text Word] OR placebo[Text Word])))) OR (prospective[Text Word] OR retrospective[Text Word])))) | 117         |
| #41    | Search ((((((“Randomized Controlled Trial” [Publication Type]) OR “Controlled Clinical Trial” [Publication Type]) OR “Randomized Controlled Trials as Topic”[Mesh]) OR “Controlled Clinical Trials as Topic”[Mesh]) OR “Retrospective Studies”[Mesh]) OR “Prospective Studies”[Mesh]) OR ((((((“Controlled Clinical Trial”[Publication Type]) OR “Controlled Clinical Trials as Topic”[Mesh])) OR ((random*[Text Word] OR controlled[Text Word] OR crossover[Text Word] OR cross-over[Text Word] OR blind*[Text Word] OR mask*[Text Word])) AND (trial[Text Word] OR trials[Text Word] OR study[Text Word] OR studies[Text Word] OR analys*[Text Word] OR analyz*[Text Word] OR rct[Text Word] OR rcts[Text Word] OR rct[Text Word] OR ((singl*[Text Word] OR doubl*[Text Word] OR tripl*[Text Word] OR mask*[Text Word])) OR placebo[Text Word])) OR (prospective[Text Word] OR retrospective[Text Word]))                                                                                                                                                                                                                                                                                                                                                                                                                                                                                                        | 2955261     |
| #40    | Search (prospective[Text Word] OR retrospective[Text Word])                                                                                                                                                                                                                                                                                                                                                                                                                                                                                                                                                                                                                                                                                                                                                                                                                                                                                                                                                                                                                                                                                                                                                                                                                                                                                                                                                        | 1548133     |
| #39    | Search ((((((“Controlled Clinical Trial”[Publication Type]) OR “Controlled Clinical Trials as Topic”[Mesh])) OR ((random*[Text Word] OR controlled[Text Word] OR crossover[Text Word] OR cross-over[Text Word] OR blind*[Text Word] OR mask*[Text Word])) AND (trial[Text Word] OR trials[Text Word] OR study[Text Word] OR studies[Text Word] OR analys*[Text Word] OR analyz*[Text Word] OR rct[Text Word] OR rcts[Text Word] OR rct[Text Word] OR ((singl*[Text Word] OR doubl*[Text Word] OR tripl*[Text Word] OR mask*[Text Word])) AND (blind[Text Word] OR placebo[Text Word]))                                                                                                                                                                                                                                                                                                                                                                                                                                                                                                                                                                                                                                                                                                                                                                                                                             | 1656743     |
| #38    | Search “Prospective Studies”[Mesh]                                                                                                                                                                                                                                                                                                                                                                                                                                                                                                                                                                                                                                                                                                                                                                                                                                                                                                                                                                                                                                                                                                                                                                                                                                                                                                                                                                                 | 495282      |
| #35    | Search “Retrospective Studies”[Mesh]                                                                                                                                                                                                                                                                                                                                                                                                                                                                                                                                                                                                                                                                                                                                                                                                                                                                                                                                                                                                                                                                                                                                                                                                                                                                                                                                                                               | 734194      |
| #32    | Search “Controlled Clinical Trials as Topic”[Mesh]                                                                                                                                                                                                                                                                                                                                                                                                                                                                                                                                                                                                                                                                                                                                                                                                                                                                                                                                                                                                                                                                                                                                                                                                                                                                                                                                                                 | 128927      |
| #29    | Search “Randomized Controlled Trials as Topic”[Mesh]                                                                                                                                                                                                                                                                                                                                                                                                                                                                                                                                                                                                                                                                                                                                                                                                                                                                                                                                                                                                                                                                                                                                                                                                                                                                                                                                                               | 123922      |
| #26    | Search “Controlled Clinical Trial” [Publication Type]                                                                                                                                                                                                                                                                                                                                                                                                                                                                                                                                                                                                                                                                                                                                                                                                                                                                                                                                                                                                                                                                                                                                                                                                                                                                                                                                                              | 565794      |
| #24    | Search “Randomized Controlled Trial” [Publication Type]                                                                                                                                                                                                                                                                                                                                                                                                                                                                                                                                                                                                                                                                                                                                                                                                                                                                                                                                                                                                                                                                                                                                                                                                                                                                                                                                                            | 477698      |
| #20    | Search ((((((“Alveolar Ridge Augmentation”[Mesh]) OR ((alveolar ridge augment*[Text Word]) OR alveolar augment*[Text Word])) OR ((lateral ridge augment*[Text Word]) OR horizontal ridge augment*[Text Word]))) AND ((((((“Allografts”[Mesh]) OR allograft*[Text Word]) OR ((allogeneic*[Text Word]) OR allogenic*[Text Word])) OR “Cryopreservation”[Mesh]) OR fresh-frozen*[Text Word]) OR “Freeze Drying”[Mesh]) OR ((freeze dry*[Text Word]) OR freeze drier*[Text Word]))                                                                                                                                                                                                                                                                                                                                                                                                                                                                                                                                                                                                                                                                                                                                                                                                                                                                                                                                     | 379         |
| #19    | Search ((((((“Allografts”[Mesh]) OR allograft*[Text Word]) OR ((allogeneic*[Text Word]) OR allogenic*[Text Word])) OR “Cryopreservation”[Mesh]) OR fresh-frozen*[Text Word]) OR “Freeze Drying”[Mesh]) OR ((freeze dry*[Text Word]) OR freeze drier*[Text Word])                                                                                                                                                                                                                                                                                                                                                                                                                                                                                                                                                                                                                                                                                                                                                                                                                                                                                                                                                                                                                                                                                                                                                   | 177542      |
| #18    | Search (freeze dry*[Text Word] OR freeze drier*[Text Word])                                                                                                                                                                                                                                                                                                                                                                                                                                                                                                                                                                                                                                                                                                                                                                                                                                                                                                                                                                                                                                                                                                                                                                                                                                                                                                                                                        | 20754       |
| #17    | Search “Freeze Drying”[Mesh]                                                                                                                                                                                                                                                                                                                                                                                                                                                                                                                                                                                                                                                                                                                                                                                                                                                                                                                                                                                                                                                                                                                                                                                                                                                                                                                                                                                       | 12822       |
| #15    | Search fresh-frozen*[Text Word]                                                                                                                                                                                                                                                                                                                                                                                                                                                                                                                                                                                                                                                                                                                                                                                                                                                                                                                                                                                                                                                                                                                                                                                                                                                                                                                                                                                    | 12493       |
| #14    | Search “Cryopreservation”[Mesh]                                                                                                                                                                                                                                                                                                                                                                                                                                                                                                                                                                                                                                                                                                                                                                                                                                                                                                                                                                                                                                                                                                                                                                                                                                                                                                                                                                                    | 35168       |
| #11    | Search (allogeneic*[Text Word]) OR allogenic*[Text Word]                                                                                                                                                                                                                                                                                                                                                                                                                                                                                                                                                                                                                                                                                                                                                                                                                                                                                                                                                                                                                                                                                                                                                                                                                                                                                                                                                           | 64534       |
| #10    | Search allograft*[Text Word]                                                                                                                                                                                                                                                                                                                                                                                                                                                                                                                                                                                                                                                                                                                                                                                                                                                                                                                                                                                                                                                                                                                                                                                                                                                                                                                                                                                       | 67424       |
| #9     | Search “Allografts”[Mesh]                                                                                                                                                                                                                                                                                                                                                                                                                                                                                                                                                                                                                                                                                                                                                                                                                                                                                                                                                                                                                                                                                                                                                                                                                                                                                                                                                                                          | 6588        |
| #6     | Search (((“Alveolar Ridge Augmentation”[Mesh]) OR ((alveolar ridge augment*[Text Word]) OR alveolar augment*[Text Word])) OR ((lateral ridge augment*[Text Word]) OR horizontal ridge augment*[Text Word])                                                                                                                                                                                                                                                                                                                                                                                                                                                                                                                                                                                                                                                                                                                                                                                                                                                                                                                                                                                                                                                                                                                                                                                                         | 4080        |
| #5     | Search (lateral ridge augment*[Text Word]) OR horizontal ridge augment*[Text Word]                                                                                                                                                                                                                                                                                                                                                                                                                                                                                                                                                                                                                                                                                                                                                                                                                                                                                                                                                                                                                                                                                                                                                                                                                                                                                                                                 | 118         |
| #4     | Search (alveolar ridge augment*[Text Word]) OR alveolar augment*[Text Word]                                                                                                                                                                                                                                                                                                                                                                                                                                                                                                                                                                                                                                                                                                                                                                                                                                                                                                                                                                                                                                                                                                                                                                                                                                                                                                                                        | 4061        |
| #3     | Search “Alveolar Ridge Augmentation”[Mesh]                                                                                                                                                                                                                                                                                                                                                                                                                                                                                                                                                                                                                                                                                                                                                                                                                                                                                                                                                                                                                                                                                                                                                                                                                                                                                                                                                                         | 3893        |
