# Supplementary material for: Horizontal Alveolar Ridge Augmentation with Allogeneic Bone Block Graft Compared with Autogenous Bone Block Graft: a Systematic Review
Source: PubMed Central journal article supplement — J Oral Maxillofac Res. 2020 Mar 31;11(1):e1. doi: 10.5037/jomr.2020.11101 (PMC7191383; doi:10.5037/jomr.2020.11101), 2020-03-31
Supplement: jomr-11-e1-a003.pdf [file jomr-11-e1-a003.pdf]

**Appendix 3.** Embase search until the 13<sup>th</sup> of March, 2019

| No. | Query                                                                                                                                              | Results |
|-----|----------------------------------------------------------------------------------------------------------------------------------------------------|---------|
| #25 | #16 AND #24                                                                                                                                        | 54      |
| #24 | #17 OR #18 OR #19 OR #20 OR #21 OR #22 OR #23                                                                                                      | 8348399 |
| #23 | 'retrospective':ti,ab,de OR 'prospective':ti,ab,de                                                                                                 | 1889391 |
| #22 | 'prospective study'/exp                                                                                                                            | 501191  |
| #21 | 'retrospective study'/de                                                                                                                           | 742766  |
| #20 | ((single OR double OR triple) NEAR/2 (blind* OR mask*)):ti,ab,de) OR placebo:ti,ab,de                                                              | 553332  |
| #19 | ((random* OR controlled* OR crossover OR 'cross over' OR blind* OR mask*) NEAR/3 (trial* OR study OR studies OR analy*)):ti,ab,de) OR rct:ti,ab,de | 7025700 |
| #18 | 'randomized controlled trial'/exp                                                                                                                  | 537166  |
| #17 | 'controlled clinical trial'/exp                                                                                                                    | 704690  |
| #16 | #6 AND #15                                                                                                                                         | 142     |
| #15 | #7 OR #8 OR #9 OR #10 OR #11 OR #12 OR #13 OR #14                                                                                                  | 314569  |
| #14 | 'cryopreservation'/de                                                                                                                              | 38252   |
| #13 | 'fresh frozen*'                                                                                                                                    | 27926   |
| #12 | 'freeze dry*' OR 'freeze drie*'                                                                                                                    | 28013   |
| #11 | 'freeze drying'/de                                                                                                                                 | 20066   |
| #10 | 'allograft transplantation'/de                                                                                                                     | 35557   |
| #9  | 'allogeneic*' OR 'allogenic*'                                                                                                                      | 111004  |
| #8  | 'allograft*'                                                                                                                                       | 104671  |
| #7  | 'allograft'/exp                                                                                                                                    | 39144   |
| #6  | #1 OR #2 OR #3 OR #4 OR #5                                                                                                                         | 1046    |
| #5  | 'horizontal ridge augment*'                                                                                                                        | 53      |
| #4  | 'lateral ridge augment*'                                                                                                                           | 55      |
| #3  | 'alveolar ridge augment*'                                                                                                                          | 931     |
| #2  | 'alveolar augment*'                                                                                                                                | 70      |
| #1  | 'alveolar ridge augmentation'/de                                                                                                                   | 502     |

**Appendix 4.** Cochrane Library search until the 13<sup>th</sup> of March, 2019

| ID  | Search                                                                  | Hits |
|-----|-------------------------------------------------------------------------|------|
| #1  | MeSH descriptor: [Alveolar Ridge Augmentation] explode all trees        | 283  |
| #2  | (alveolar ridge augment*):ti,ab,kw (Word variations have been searched) | 362  |
| #3  | (alveolar augment*):ti,ab,kw                                            | 513  |
| #4  | (lateral ridge augment*):ti,ab,kw                                       | 50   |
| #5  | (horizontal ridge augment*):ti,ab,kw                                    | 74   |
| #6  | #1 or #2 or #3 or #4 or #5                                              | 527  |
| #7  | MeSH descriptor: [Allografts] explode all trees                         | 139  |
| #8  | (allograft*):ti,ab,kw                                                   | 3439 |
| #9  | (allogeneic* or allgenic*):ti,ab,kw                                     | 3727 |
| #10 | MeSH descriptor: [Cryopreservation] explode all trees                   | 535  |
| #11 | (fresh frozen*):ti,ab,kw                                                | 1102 |
| #12 | MeSH descriptor: [Freeze Drying] explode all trees                      | 184  |
| #13 | (freeze dry*):ti,ab,kw                                                  | 288  |
| #14 | (freeze drie*):ti,ab,kw                                                 | 514  |
| #15 | #7 or #8 or #9 or #10 or #11 or #12 or #13 or #14                       | 8749 |
| #16 | #6 and #15 in Trials                                                    | 72   |
